# Supplementary material for: RPGR isoform imbalance causes ciliary defects due to exon ORF15 mutations in X-linked retinitis pigmentosa (XLRP)
Source: PubMed Central journal article supplement — Hum Mol Genet. 2020 Dec 23;29(22):3706–16. doi: 10.1093/hmg/ddaa269 (PMC7823108; doi:10.1093/hmg/ddaa269), 2020-12-23
Supplement: morenoleon_et_al-supplementary_material_ddaa269.pdf [file morenoleon_et_al-supplementary_material_ddaa269.pdf]

## **Supplementary Material:**

**Generation and characterization of RPGR isoform-specific antibodies:** The RPGR isoform-specific antibodies were generated against the protein domains present specifically in each isoform (Abclonal). For RPGR<sup>ex1-19</sup>-specific antibody, the protein domain encoded by amino acids 923-1039 encompassing exons 16-18 of the RPGR protein was used to generate antibodies in rabbits. For RPGR<sup>ORF15</sup>-specific antibody, we used the protein domain encoded by amino-acids 563-804 encompassing exon ORF15.

## **Human photoreceptor stem cell maintenance and retinal differentiation culture**

The human embryonic and iPS stem cell lines (Rb2 from Wicell and iPS RPGR cell lines) were maintained in feeder free conditions with E8 (Thermo Fisher) media on geltrex coated 6 well plates. Briefly, when 80% confluent hPSCs were dissociated using Versene solution for 10 minutes. PSC small clumps were collected, washed twice with PBS and resuspended in E8 media for further maintenance culture on 6 well plates. For retinal neuroepithelial differentiation, human PSCs were maintained as described above until 90-95% confluent, then media without FGF (E6, Thermo Fisher) was added to the cultures for two days (D1 and 2 of differentiation) followed by a neural induction period (up to 7 weeks) in proneural induction media (Advanced DMEM/F12, MEM non essential amino acids, N2 Supplement, 100mM Glutamine and Pen/Strep). Lightly- pigmented islands of retinal pigmented epithelium (RPE) appeared as early as week 3 in culture. Optic vesicles were formed from within the RPE region between weeks 4 and 7. During this period neuroretinal vesicles were manually excised with 21G needles and kept individually in low binding 96 well plates in retinal differentiation media (DMEM, F12,

Pen/Strep and B27 without retinoic acid). At 6 wks of differentiation retinal differentiation medium was supplemented with 10% FBS, 100uM taurine (Sigma, T4871) and 2mM glutamax and at 10 wks 1 uM retinoic acid (RA) was added (RDM+ Factors media). At 10 wks of culture vesicles were transferred to low binding 24 well plates (5 vesicles/well). At 12 wks of differentiation, media was changed again to ALT media (Advanced DMEM/F12, B27 without retinoic acid, N2 Supplement, 4 mM glutamax, 7.5mM glucose, 100uM taurine, 0.5  $\mu$ M RA and Pen/Strep). Maintenance cultures of hPSCs were feed daily and differentiation cultures were feed every 2-3 days. At 24 weeks 10 retinal organoids were collected per sample and snap frozen or placed in Trizol and stored at -20°C.

## Supplementary Figure 1:

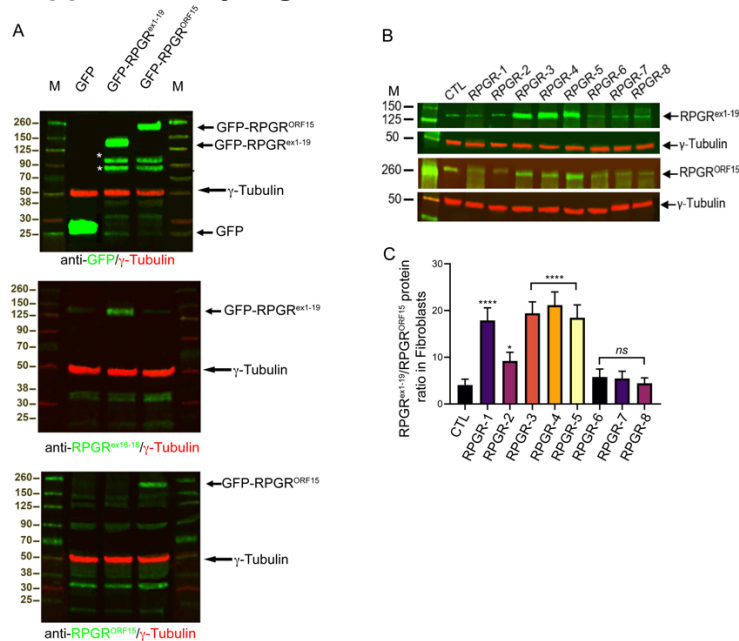

**A.** Cell extracts from HEK293 cells transiently transfected with plasmids encoding GFP, GFP-RPGR<sup>ORF15</sup> or GFP-RPGR<sup>ex1-19</sup> were analyzed by SDS-PAGE and immunoblotting using indicated antibodies. Green channel indicates the bands obtained using the GFP or RPGR antibodies. Immunoblotting using anti- $\gamma$ -tubulin (red) was used as loading control. M: apparent molecular weight marker (kDa). **B.** Protein extracts (100  $\mu$ g) of the indicated fibroblasts were analyzed by SDS-PAGE and immunoblotting using RPGR<sup>ex1-19</sup> or RPGR<sup>ORF15</sup>-specific (green) or  $\gamma$ -tubulin (red; loading control) antibodies. **C.** The RPGR<sup>ex1-19</sup>/RPGR<sup>ORF15</sup> protein ratio was calculated relative to the  $\gamma$ -tubulin levels, which were uniform among all samples. Data are mean  $\pm$  SD from three independent experiments (with  $n > 100$ /experiment). **D.** *RPGR<sup>ex1-19</sup>/RPGR<sup>ORF15</sup>* mRNA expression was calculated in control (CTL) and RPGR-3 optic cups. Statistically significant differences are indicated (\*\*\*\*:  $p < 0.0001$ ; \* $p < 0.01$ ).

## Supplementary Figure 2

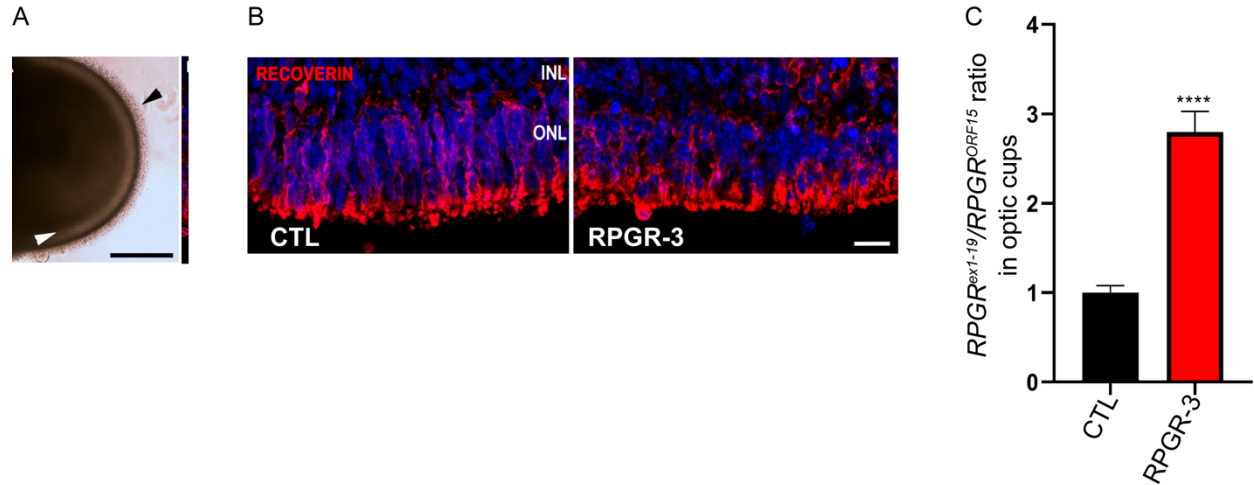

**A.** Bright field image of a 22 weeks RPGR-3 PSC-derived retinal organoid, demonstrating retinal layers (white arrowhead) and the presence of a brush border (black arrowhead). Scale bar: 100  $\mu$ m. **B.** Immunohistochemical staining of control (CTL) and RPGR-3 PSC-derived retinal organoid cryosections at 22 weeks, showing RECOVERIN+ (red) photoreceptors in the outer nuclear-like layer (ONL). DAPI in blue. Scale bar: 15  $\mu$ m. **C.** Quantitative RT-PCR analysis of the RPGR isoforms extracted from the control and RPGR-3 was performed. The results show the  $RPGR^{ex1-19}/RPGR^{ORF15}$  ratio in the RPGR-3 organoids relative to the control (CTL). ONL: outer nuclear layer; INL: inner nuclear layer.

### Supplementary Figure 3:

**A**

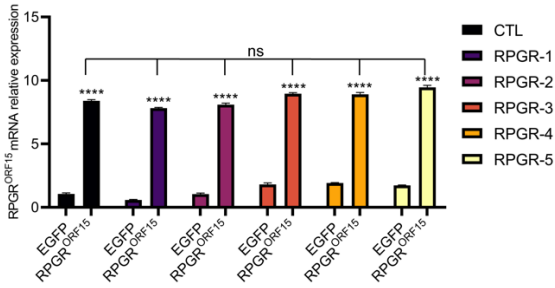

**B**

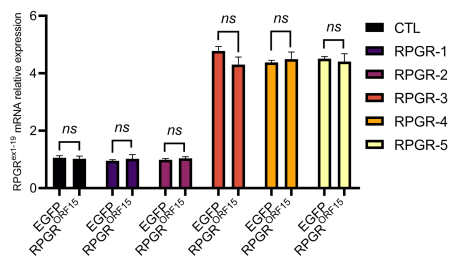

Expression of RPGR<sup>ORF15</sup> (**A**) and RPGR<sup>ex1-19</sup> (**B**) was analyzed by qRT-PCR after transfecting the indicated human fibroblasts with pEGFP empty vector or pEGFP-RPGR<sup>ORF15</sup>. All cells overexpressed RPGR<sup>ORF15</sup> to similar levels (4-5 folds higher) when compared to RPGR<sup>ORF15</sup> levels in the pEGFP-expressing cells. **B**: RPGR<sup>ORF15</sup> overexpression did not affect RPGR<sup>ex1-19</sup> mRNA levels in fibroblasts.

## Supplementary Figure 4

**A**

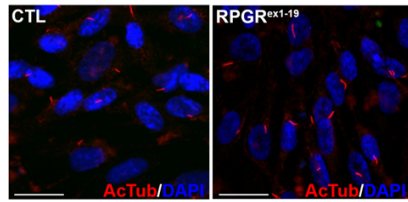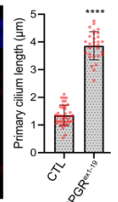

**B**

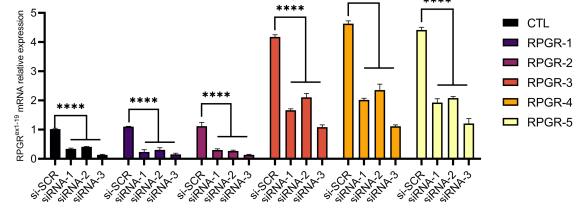

**C**

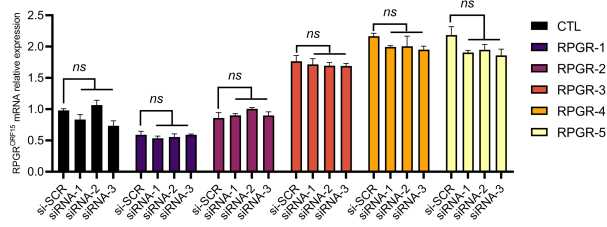

**A:** hTERT-RPE-1 cells were transiently transfected with cDNA encoding GFP alone or GFP-RPGR<sup>ex1-19</sup> followed by staining with acetylated  $\alpha$ -tubulin (AcTub; red). DAPI (blue) was used to stain the nuclei. The cilia length was quantified and represented as a bar graph. \*\*\*\*:  $p < 0.0001$ . **B:** Three siRNAs against RPGR<sup>ex1-19</sup> (siRNA-1, siRNA-2, and siRNA-3) were tested for their ability to knock down RPGR<sup>ex1-19</sup> expression after transfection into the indicated human fibroblasts. Although all siRNAs exhibited significant down-regulation of the RPGR<sup>ex1-19</sup> isoform when compared to a scrambled siRNA, siRNA-3 was the most potent. \*\*\*\*:  $p < 0.0001$ . **C:** RPGR<sup>ex1-19</sup> siRNA expression did not alter the expression of RPGR<sup>ORF15</sup>. ns: not significant.

**Supplementary Table 1**

| <b>Western Blot</b>                   |                     |                      |          |                           |
|---------------------------------------|---------------------|----------------------|----------|---------------------------|
| Name                                  | Brand               | Cat number           | Dilution |                           |
| RPGR ex16-18                          | Abclonal            | Supplementary Fig 1A | 1:1000   | Rabbit I <sup>Y</sup> Ab  |
| RPGR <sup>ORF15</sup>                 | Abclonal            | Supplementary Fig 1A | 1:1000   | Rabbit I <sup>Y</sup> Ab  |
| IRDye 680LT anti mouse                | Licor               | 926-68020            | 1:5000   | Goat II <sup>Y</sup> Ab   |
| IRDye 800CW anti rabbit               | Licor               | 926-32211            | 1:5000   | Goat II <sup>Y</sup> Ab   |
| Anti-acetylated $\alpha$ -tubulin     | Sigma Aldrich       | T6793                | 1:500    | Mouse I <sup>Y</sup> Ab   |
| Anti- $\gamma$ -tubulin (GT4511)      | Invitrogen          | MA5-31482            | 1:500    | Mouse I <sup>Y</sup> Ab   |
| Anti-polyglutamylated tubulin (GT335) | Adipogen            | AG-20B-0020B-C100    | 1:200    | Mouse I <sup>Y</sup> Ab   |
| Anti-Rhodopsin clone RET-P1           | Merk Millipore      | MAB5316              | 1:200    | Mouse I <sup>Y</sup> Ab   |
| Anti-CEP290                           | Bethyl Laboratories | A301-659A            | 1:200    | Rabbit I <sup>Y</sup> Ab  |
| Anti-Arl13b                           | Proteintech         | 17711-1-AP           | 1:500    | Rabbit I <sup>Y</sup> Ab  |
| Anti-GFP                              | Abcam               | ab13970              | 1:500    | Chicken I <sup>Y</sup> Ab |
| Anti-Mouse IgG (H+L), 488nm           | Invitrogen          | A32723               | 1:1000   | Goat II <sup>Y</sup> Ab   |
| Anti-Mouse IgG (H+L), 546nm           | Invitrogen          | A11030               | 1:1000   | Goat II <sup>Y</sup> Ab   |
|                                       |                     |                      |          |                           |
| Anti-Rabbit IgG (H+L), 488nm          | Invitrogen          | A11008               | 1:1000   | Goat II <sup>Y</sup> Ab   |
| Anti-Rabbit IgG (H+L), 546nm          | Invitrogen          | A11010               | 1:1000   | Goat II <sup>Y</sup> Ab   |
| Anti-Chicken IgG (H+L), 488nm         | Invitrogen          | A11039               | 1:1000   | Goat II <sup>Y</sup> Ab   |

**Supplementary Table 2:**

| <b>RT-qPCR primers</b>            |                              |
|-----------------------------------|------------------------------|
| <b>Name</b>                       | <b>Sequence</b>              |
| RPGR <sup>ex1-19</sup> E17-18 Fwd | GAACGGGCCATTTGTGAGTA         |
| RPGR <sup>ex1-19</sup> E19 Rev    | GGTTCTGGTCGGCATCTTTAT        |
| RPGR <sup>ORF15</sup> E15 Fwd     | GGAAGGAGCAGAGGATTCAAA        |
| RPGR <sup>ORF15</sup> ORF15 Rev   | CCTCATCTTGCCAGTGTTCT         |
| $\beta$ -actin Fwd                | GACCTCTATGCCAACACAGT         |
| $\beta$ -actin Rev                | AGTACTTGCGCTCAGGAGGA         |
| RPLP0 Fwd                         | GCATCAGTACCCCATTCTATCAT      |
| RPLP0 Rev                         | AGGTGTAATCCGTCTCCACAGA       |
| <b>DsiRNAs for knockdown</b>      |                              |
| <b>Name</b>                       | <b>Duplex sequence</b>       |
| dsi-NC-SCR Fwd                    | CUUCCUCUCUUUCUCUCCCUUGUGA    |
| dsi-NC-SCR Rev                    | AGGAAGGAGAGAAAGAGAGGGAACACU  |
| dsi-RPGR <sup>ex1-19</sup> .1 Fwd | CACCAAGCAAAGACAUGAAAAAAAC    |
| dsi-RPGR <sup>ex1-19</sup> .1 Rev | UUGUGGUUCGUUUCUGUACUUUUUUUG  |
| dsi-RPGR <sup>ex1-19</sup> .2 Fwd | GGAGCAGAAAAGAACCAAUGAUGATA   |
| dsi-RPGR <sup>ex1-19</sup> .2 Rev | UUCCUCGUCUUUCUUGGUUACUACUUAU |
| dsi-RPGR <sup>ex1-19</sup> .3 Fwd | AUCAAAAGAUUGUCAAGAAUAACAA    |
| dsi-RPGR <sup>ex1-19</sup> .3 Rev | UUUAGUUUUCUAACAGUUCUUAUUGUU  |
